# Supplementary material for: Evidence for selection events during domestication by extensive mitochondrial genome analysis between japonica and indica in cultivated rice
Source: PubMed Central journal article supplement (PMC6659709; doi:10.1038/s41598-019-47318-x), 2019-07-26
Supplement: 41598_2019_47318_MOESM1_ESM.pdf [file 41598_2019_47318_MOESM1_ESM.pdf]

**Supplementary Material for ‘Evidence for selection events during domestication by extensive mitochondrial genome analysis between *japonica* and *indica* in cultivated rice’**

Lin Cheng<sup>1</sup>, Kyu-Won Kim<sup>2\*</sup> & Yong-Jin Park<sup>1,2\*</sup>

<sup>1</sup>Department of Plant Resources, College of Industrial Science, Kongju National University, Yesan 32439, Republic of Korea

<sup>2</sup>Center for Crop Breeding on Omics and Artificial Intelligence, Kongju National University, Yesan 32439, Republic of Korea

\*Correspondence: [kyuwonkim@kongju.ac.kr](mailto:kyuwonkim@kongju.ac.kr) (KK); [yjpark@kongju.ac.kr](mailto:yjpark@kongju.ac.kr) (YP)

# Supplementary information

## Supplementary Figures

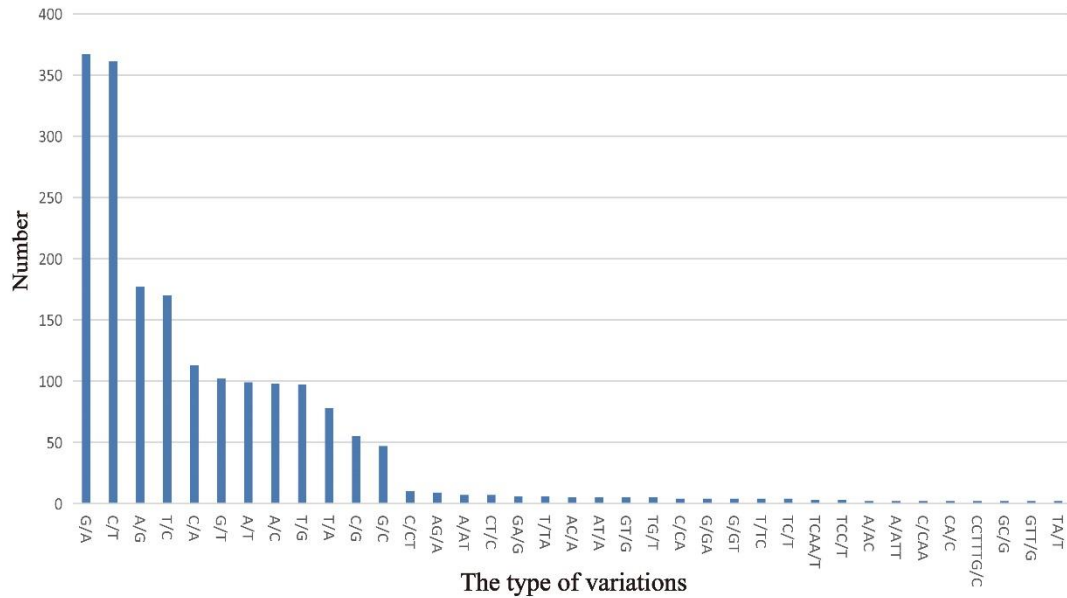

**Supplementary Figure S1. The number of different types of variants.** Here, the summary of the high-quality variants is shown. Note only these number of variants more than once are shown in this figure.

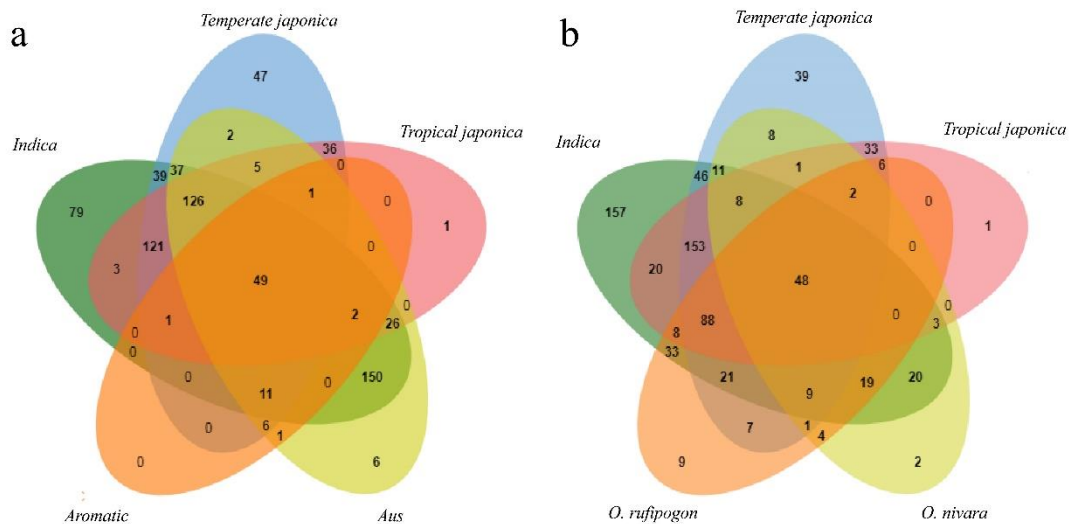

**Supplementary Figure S2. The number of variants in subgroups.** (a) Venn diagram of Asian rice (*temperate japonica*, *tropical japonica*, *aromatic*, *aus* and *indica*). (b) The number of variants in *japonica*, *indica*, *O. rufipogon*, and *O. nivara*. The number in the figure indicates the same SNV position in each population, and different colors represent different subgroups.

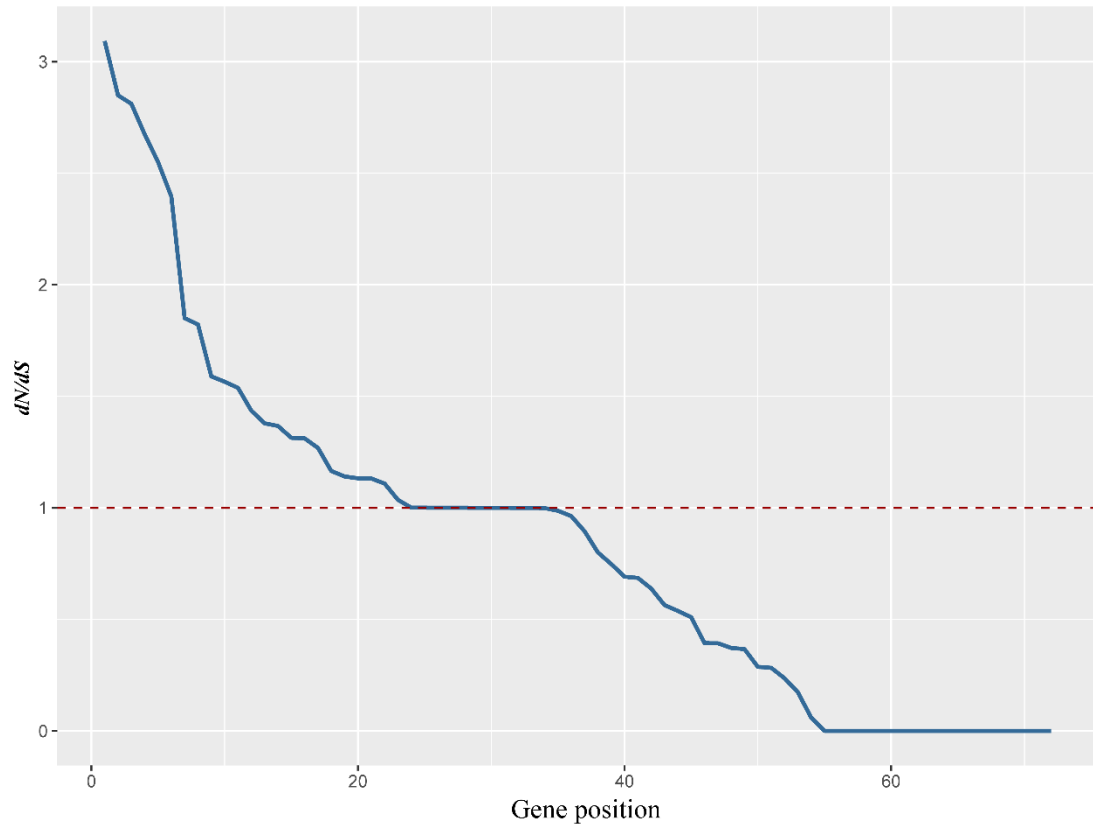

**Supplementary Figure S3.**  $dN/dS$  values of all genes in the mt genome. The decrease in Ka/Ks values of 87 selection genes in 23 typical rice accessions.

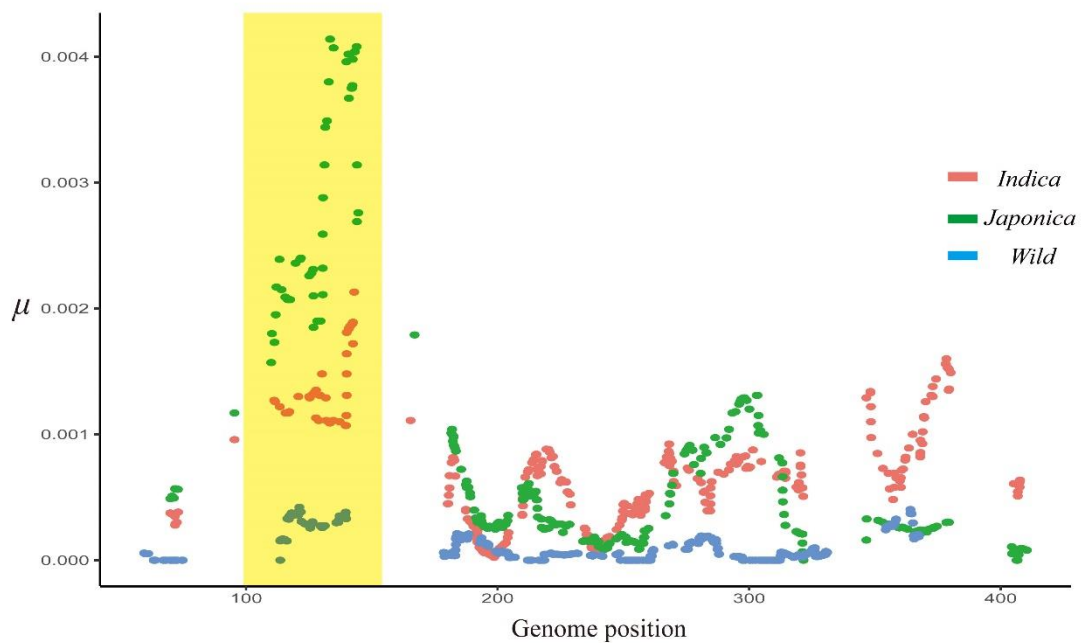

**Supplementary Figure. S4.** The selective sweep analysis of RAiSD in cultivated rice and wild rice. The x-axis represents the location of the genome and the y-axis represents  $\mu$  values.

## Supplementary Tables

**Supplementary Table S1.** Summary of the information of the total samples.

**Supplementary Table S2.** Summary of the total variants among the subgroups.

**Supplementary Table S3.** Location of all the SNPs and InDels in their coding region in the reference detected in this study.

**Supplementary Table S4.** Allele frequency information of *indica*, *temperate japonica* and *tropical japonica*.

**Supplementary Table S5.** Comparison of nucleotide diversity among all samples, Asian rice, and wild rice.

**Supplementary Table S6.** Comparison of nucleotide diversity of *indica*, *O. rufipogon*, *O. nivara*, and *japonica*.

**Supplementary Table S7.** Reduction in nucleotide diversity between *indica* and *japonica* in the cp genome.

**Supplementary Table S8.** Comparison of Tajima's *D* values of all accessions and subgroups.

**Supplementary Table S9.** The result of haplotype

**Supplementary Table 1-9 are in separate files.**
